# Supplementary material for: Intermolecular steric inhibition of Ephexin4 is relieved by Elmo1
Source: PubMed Central journal article supplement (PMC5493634; doi:10.1038/s41598-017-04810-6), 2017-06-30
Supplement: 41598_2017_4810_MOESM1_ESM.pdf [file 41598_2017_4810_MOESM1_ESM.pdf]

# Intermolecular steric inhibition of Ephexin4 is relieved by Elmo1

Kwanhyeong Kim<sup>1,2</sup>, Juyeon Lee<sup>1,2</sup>, Sang-Ah Lee<sup>1</sup>, Hyunji Moon<sup>1,2</sup>, Boyeon Park<sup>1</sup>,  
Deokhwan Kim<sup>1</sup>, Young-Eun Joo<sup>3</sup>, Daeho Park<sup>1,2,4</sup>

*1. School of Life Sciences and Aging Research Institute, Gwangju Institute of Science and Technology, Gwangju 61005, Korea*

*2. Research Center for Cellular Homeostasis, Ewha Womans University, Seoul 03760, Korea*

*3. Department of Internal Medicine, Chonnam National University Medical School, Gwangju 61469, Korea*

*4. Department of Biomedical Science and Engineering, Gwangju Institute of Science and Technology, Gwangju 61005, Korea*

## **Correspondence to**

Daeho Park

School of Life Sciences

Gwangju Institute of Science and Technology

Gwangju 61005, Korea

Tel.: 82-62-715-2890

Fax: 82-62-715-2484

Email: [daehopark@gist.ac.kr](mailto:daehopark@gist.ac.kr)

## Supplementary S1

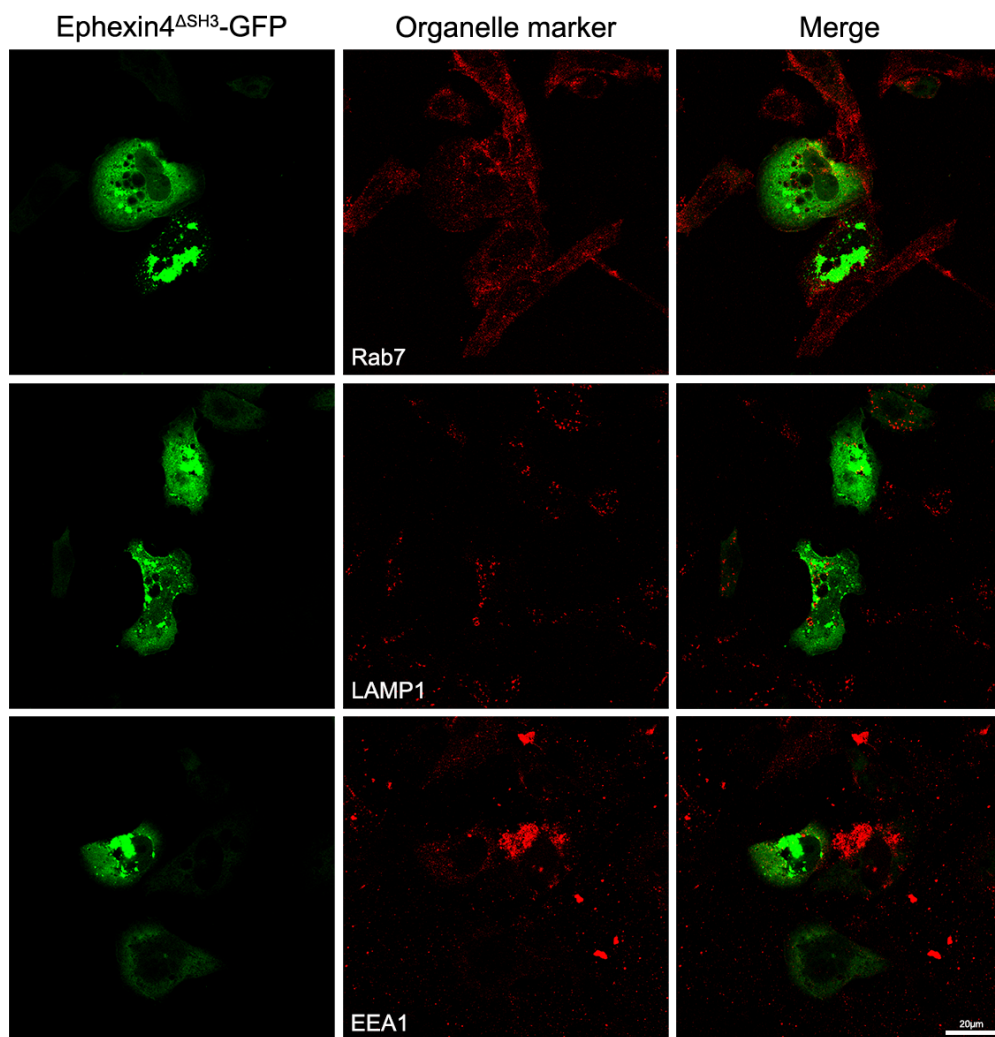

LR73 cells were transfected with Ephexin4<sup>ΔSH3</sup>-GFP. 1 day after transfection, the cells were permeabilized and stained with anti-Rab4, anti-LAMP1, or anti-EEA1. Images were obtained using confocal microscopy. Scale bar, 20  $\mu\text{m}$ .

## Supplementary S2

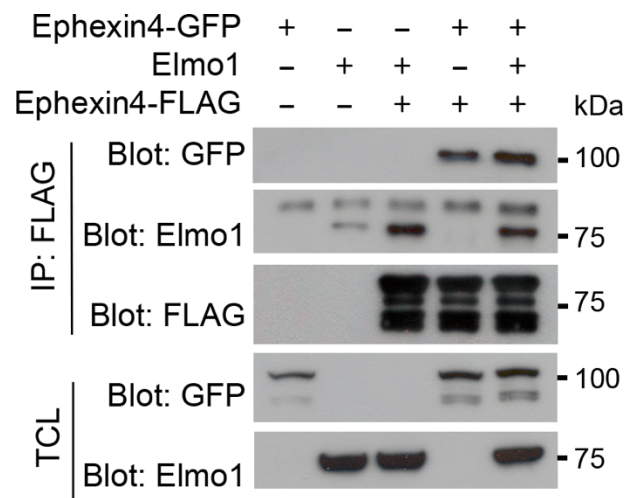

293T cells transfected with the indicated plasmids were lysed 2 day after transfection, and then the lysates were immunoprecipitated with anti-FLAG antibody. Co-immunoprecipitated proteins were detected with anti-GFP, anti-Elmo1 or anti-FLAG through western blotting. TCL, total cell lysates.

## Supplementary S3

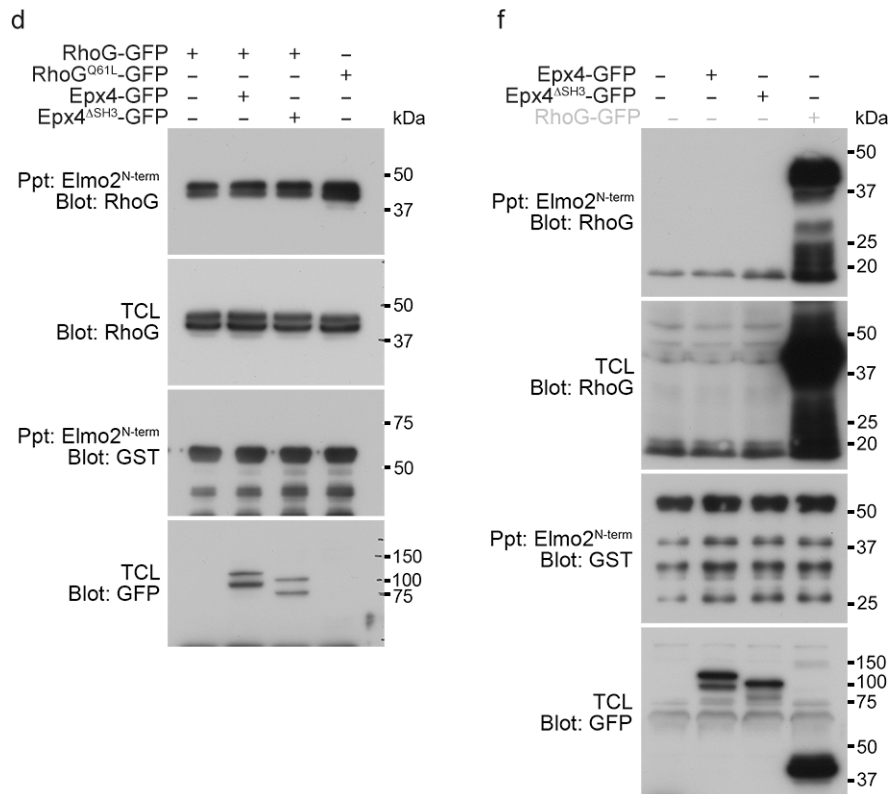

Uncropped western blots for the blots used in Figure 1

# Supplementary S4

## a *Epx4<sup>SH3</sup>-Epx4 fragments binding*

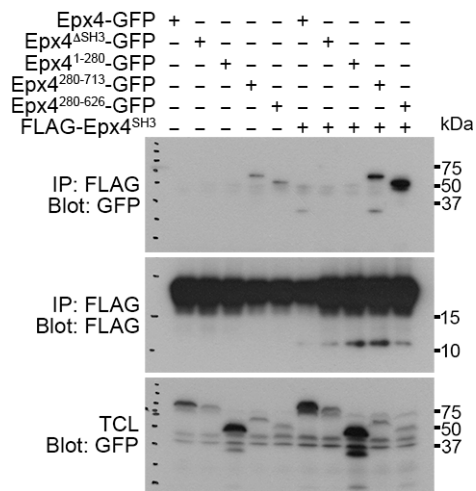

## b *Epx4-Epx4 binding*

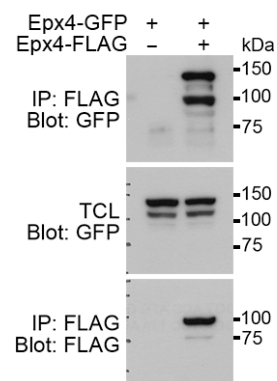

## c *Epx4<sup>ASH3</sup>-Epx4<sup>ASH3</sup> binding*

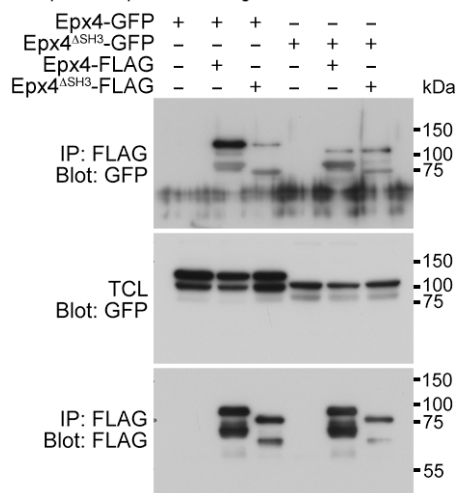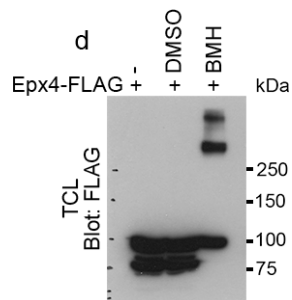

Uncropped western blots for the blots used in Figure 2

## Supplementary S5

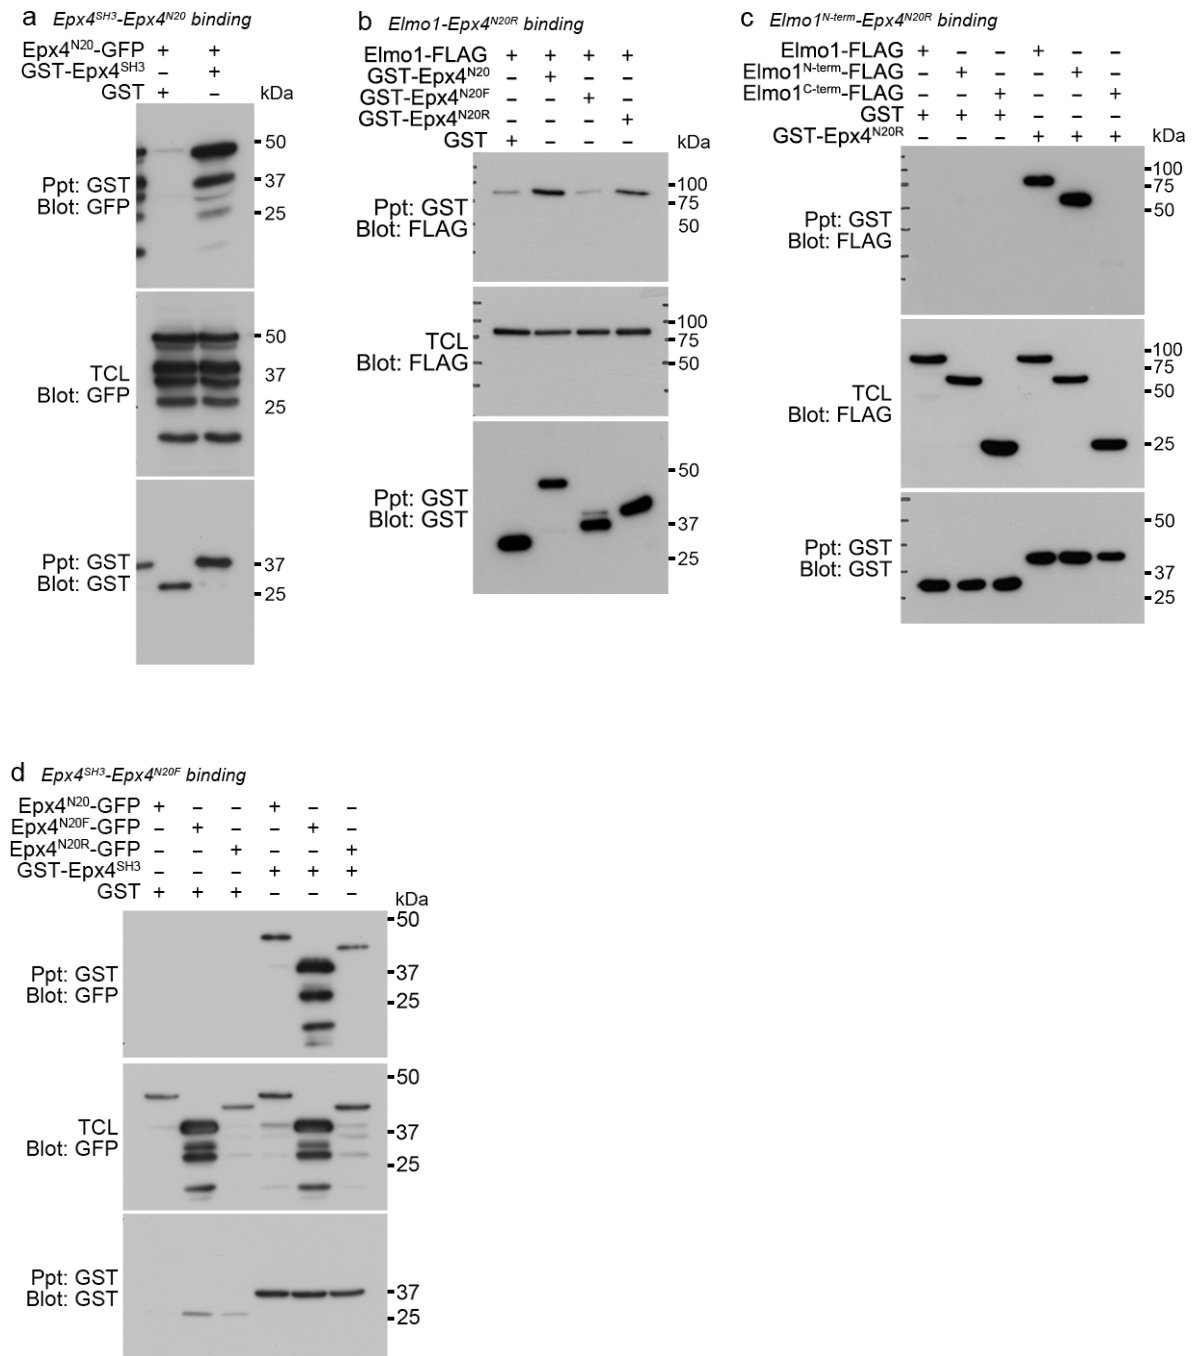

Uncropped western blots for the blots used in Figure 3

## Supplementary S6

### a *Elmo1<sup>C-term</sup>-Epx4<sup>SH3</sup> binding*

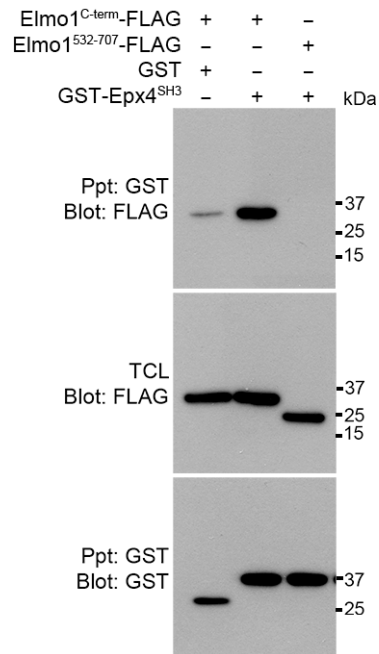

### b *RhoG-Epx4<sup>ΔSH3</sup> binding*

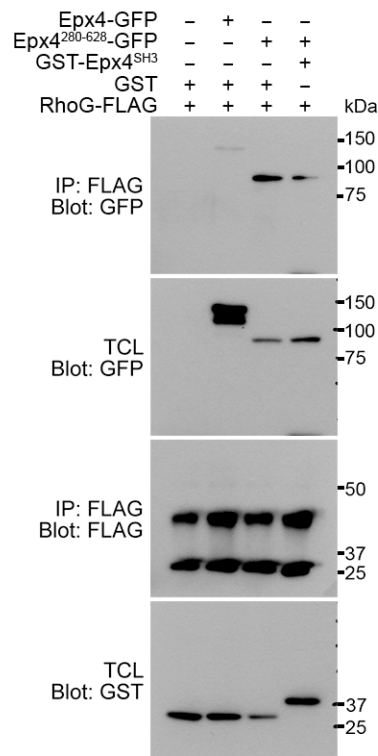

### c *Epx4<sup>SH3</sup>-Epx4<sup>N20F</sup> inhibited by Elmo1<sup>C-term</sup>*

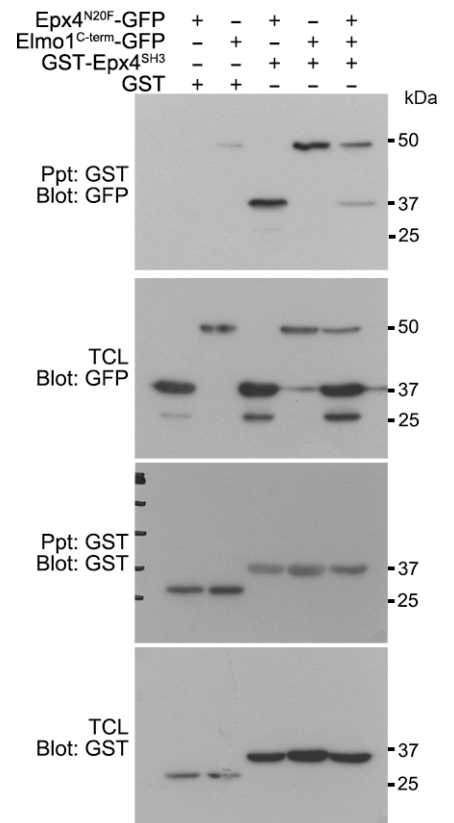

### d *RhoG-Epx4 binding*

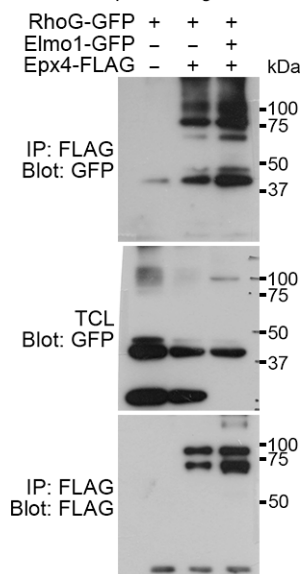

Uncropped western blots for the blots used in Figure 4

# Supplementary S7

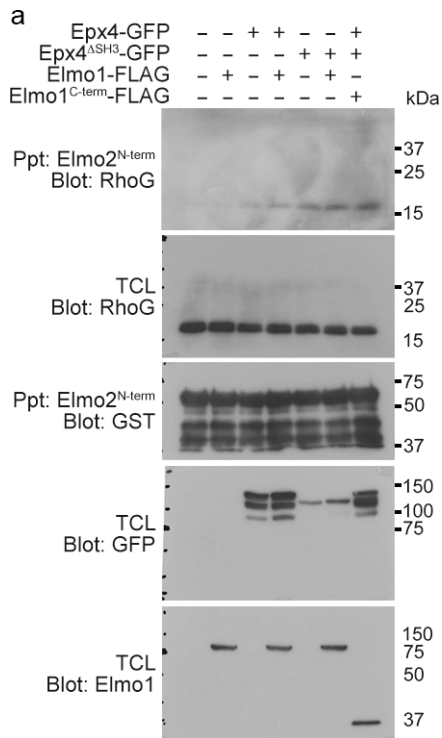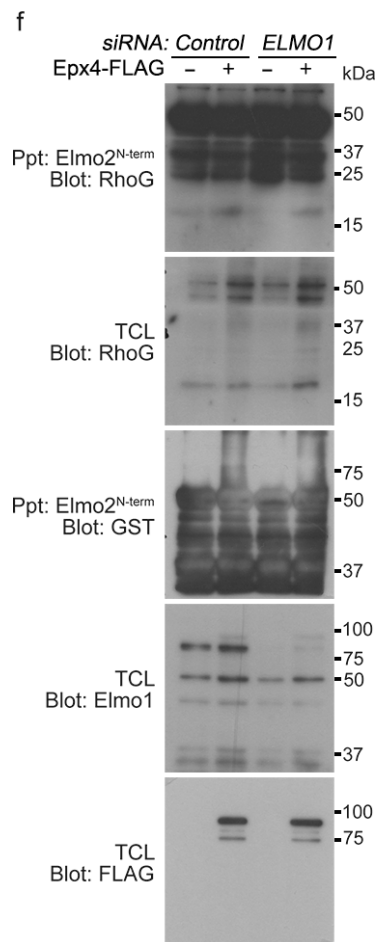

Uncropped western blots for the blots used in Figure 5



## Supplementary S8

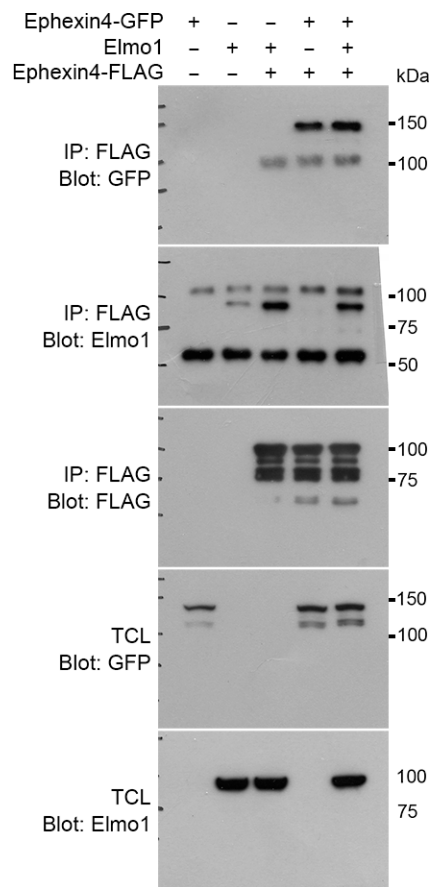

Uncropped western blots for the blots used in Supplementary S2
